1 **Linear vector models of time perception account for saccade and stimulus novelty**  
2 **interactions.**

3

4 **Amir Hossein Ghaderi<sup>1,2</sup>, and John Douglas Crawford<sup>1,2,3,4,5</sup>**

5 Centre for Vision Research<sup>1</sup> Vision Science to Applications (VISTA) Program<sup>2</sup>, Departments of  
6 Biology<sup>3</sup>, Psychology<sup>4</sup>, and Kinesiology and Health Sciences<sup>5</sup>, York University, Toronto, ON,  
7 Canada

8 **Abstract:**

9 Various models (e.g. scalar, state-dependent network, and vector models) have been proposed  
10 to explain the global aspects of time perception, but they have not been tested against specific  
11 visual phenomena like perisaccadic time compression and novel stimulus time dilation. Here,  
12 we tested how the perceived duration of a novel stimulus is influenced by 1) a simultaneous  
13 saccade, in combination with 2) a prior series of repeated stimuli in human participants. This  
14 yielded a novel behavioral interaction: pre-saccadic stimulus repetition neutralizes perisaccadic  
15 time compression. We then tested these results against simulations of the above models. Our  
16 data yielded low correlations against scalar model simulations, high but non-specific  
17 correlations for our feedforward neural network, and correlations that were both high and  
18 specific for a vector model based on identity of objective and subjective time. These results  
19 demonstrate the power of global time perception models in explaining disparate empirical  
20 phenomena and suggest that subjective time has a similar essence to time's physical vector.

21 **Keywords:** time perception, perisaccadic time distortion, stimulus repetition, vector timing,  
22 neural network, scalar timing

23 **1- Introduction**

24 Time perception studies generally assume that subjective or perceived time is distinct from  
25 objective time<sup>1-3</sup> and have explained this difference from two opposing perspectives: either  
26 from the perspective of global theories of time perception, or post-hoc explanations of specific  
27 empirical phenomena. Previous theories of time perception include linear dedicated models<sup>4</sup>  
28 such as internal clock models<sup>2,3,5</sup>, and non-linear models such as state-dependent networks  
29 (SDNs)<sup>6-8</sup>. Conversely, empirical studies have shown that various sensory and behavioral factors  
30 influence human time perception<sup>9-13</sup>, for example, perisaccadic time compression<sup>12-17</sup>, and  
31 dilated time for a novel visual stimulus following repeated stimuli<sup>18-20</sup>. Perisaccadic time  
32 compression (i.e., compressed time just before and during saccades, as opposed to post-  
33 saccadic time expansion<sup>21</sup> has been explained in terms of perisaccadic remapping<sup>14,15,17</sup> and

1 transient cortical responses<sup>22</sup>, whereas temporal expansion of a novel stimulus (after a series of  
2 repeated stimuli) has been attributed to a release from repetition suppression  
3 mechanisms<sup>19,20,23</sup>. While this post-hoc approach has the advantage of empirical grounding, it  
4 poses the risk of leading to an unlimited set of explanations, unrelated to either to each other  
5 or the more global theories<sup>24,25</sup>. Here, we attempted to reconcile these approaches by  
6 implementing global models and testing them against the previously unexplored interactions  
7 between perisaccadic time compression and time dilation of a novel stimulus after a series of  
8 repeated stimuli.

9 We considered three types of model (Figure 1). In scalar timing models (Fig. 1-a), subjective  
10 time is viewed as a scalar parameter that can be generated by an internal  
11 pacemaker/accumulator structure<sup>3</sup> or related to levels of energy spent in the brain<sup>13,26</sup>. Such  
12 models predict that specific time distortion effects (e.g., stimulus repetition vs. saccades)  
13 should add linearly. In contrast, SDN models<sup>6-8,27</sup> (Figure 1-b) are nonlinear<sup>8</sup>, being based on  
14 network training. These models assume that time distortion effects can be coded by different  
15 connectivity patterns in specific neural networks<sup>28</sup>. Such models can account for possible non-  
16 linear interactions between stimulus repetition and saccades. Finally, we considered a recently  
17 proposed vector model for subjective time (Figure 1-c), based on a physical concept of time<sup>29,30</sup>.  
18 In this model, neural time units are defined by a directional arrow and a magnitude (i.e., a  
19 vector) as in temporal physics<sup>30-32</sup>. In this framework, simultaneous time distortions can be  
20 integrated by a neuro-information approach<sup>29,30</sup>. For example, if the distortion effects of  
21 saccade and stimulus repetition are added to a vector of subjective time, they can then expand  
22 or compress subjective time within this vector space.

23 To evaluate these models, we employed a repetitive stimulus / saccade / novel stimulus  
24 paradigm in human participants (Figure 2). Participants judged the duration of a novel test  
25 stimulus relative to a previously viewed series of reference stimuli with a different orientation  
26 (Fig. 2-a). After the reference stimuli, we cued a saccade, which commenced toward the end of  
27 the test stimulus (Fig. 2-b). We then analyzed the interactions between perisaccadic time  
28 compression and repetition-induced time dilation of the test stimulus and compared these to  
29 simulations of the models described above. This yielded the novel results that time dilation  
30 after a series of repeated stimuli supersedes saccade-induced time compression, and more  
31 importantly, linear vector model simulations provided the best fits to this data (in terms of  
32 accuracy and specificity) compared to the other models of time perception. This demonstrates  
33 that global time perception models can explain specific empirical phenomena and suggests that  
34 subjective time follows the rules of objective time in a physical framework.

## 35 **2- Results**

1 Ten participants performed the experiment, in counterbalanced blocks corresponding to three  
2 *tasks* (Figure 2-a). In each task, participants judged the variable duration (140, 170, 230, or 260  
3 ms) of a test stimulus (a horizontal or vertical grid) relative to the fixed-duration (200 ms) of the  
4 last stimulus in a previously viewed series of reference stimuli with the opposite (orthogonal)  
5 orientation (Fig. 2-a). Participants were initially cued (by a small cross) to fixate their gaze just  
6 beyond one of four corners of the centrally located reference stimuli. In the main *Saccade Task*,  
7 this fixation cross shifted to the adjacent corner, triggering a vertical saccade with a  
8 stereotypical latency ( $268.4 \pm 35.5$  ms). The test stimulus appeared just before saccade onset,  
9 such that saccades commenced at or near the end of the test stimulus, depending on its  
10 duration (Fig. 2 b). Note that in this task, the test stimulus appeared at the same location as the  
11 reference stimuli but stimulated a different area of the retina (i.e., same spatial, different  
12 retinal location). To control for these spatial factors, we also included a *Fixation Task*, where  
13 the test stimulus appeared at the same location, but the fixation cross did not shift to induce a  
14 saccade (same spatial, same retinal location), and a *Retina-Fixed Task*, where the test stimulus  
15 shifted like the fixation cross to stimulate the retinal location of the pre-saccadic stimuli  
16 (different spatial, same retinal).

17 During analysis, we grouped the data from each of the above tasks into three different  
18 *conditions* to test the influence of a saccade (S), stimulus repetition (R; more than one  
19 reference stimulus), or the joint influence of both saccade and repetition (SR). To quantify  
20 participants' responses in each condition we computed individual timing performance (ITP)  
21 indices (Figure 2-c). The ITP is an index to show whether participants overestimated or  
22 underestimated the duration of the final, novel test stimulus in presence of time distortion  
23 effects. ITPs  $> 1$  signify overestimation of test stimulus duration, whereas ITPs  $< 1$  signify  
24 underestimation of test stimulus duration relative to the reference stimulus (see method  
25 section).

## 26 **2-1 Behavioral results**

27 General effects and interactions were tested statistically using a repeated measure analysis of  
28 variance (ANOVA), where the conditions (fixations vs. saccade, 1 to 3 repetitions of the  
29 reference stimulus) were selected as within-subject factors. We found significant differences of  
30 the ITP between different conditions and repetitions after Bonferroni correction. Since  
31 Mauchly's test indicated that repetition and interaction of conditions within participants were  
32 not significant, sphericity was assumed. The ANOVA revealed significant main effects of both  
33 repetition ( $F(2)=24.225$ ,  $p<0.001$ ,  $\eta^2=0.729$ ) and *Saccade/Fixation Tasks* ( $F(2)=9.048$ ,  $p=0.002$ ,  
34  $\eta^2=0.501$ ). The interaction between these effects was also significant ( $F(4)=8.030$ ,  $p<0.001$ ,  
35  $\eta^2=0.472$ ). Overall, these data suggest that subjective time is disrupted by repetition, saccades,  
36 and interactions between these factors.

1 Pairwise interactive comparisons showed that repetition of the reference stimulus altered time  
2 judgment in all three tasks (See Supplementary Analysis) but did not differentiate between  
3 these tasks. To differentiate the influence of repetition on time judgement in saccades vs. two  
4 fixation control tasks, we looked at the pairwise interactive comparisons of repetitions as a  
5 factor of task (Figure 3). No significant differences were observed between our two control  
6 tasks (*Fixation* and *Retina-Fixed*) for various repetitions of the reference stimulus  
7 presentation(s). However, for 1 presentation of the reference, Bonferroni correction showed a  
8 significant difference between the *Saccade* and *Fixation Tasks* (mean difference=0.331, SD=  
9 0.089,  $p=0.009$ ) and saccade and *Retina-Fixed Task* (mean difference=0.568, SD= 0.1,  $p=0.001$ ).  
10 For 2 or 3 trials reference stimulus presentations, no significant differences between conditions  
11 were observed (Figure 3).

12 These results show that a relative time dilation was always present after repetition (2-3  
13 presentations) of the reference stimulus, and that this effect superseded the time compression  
14 effect in the presence of a saccade. To investigate the individual results of each participant, we  
15 first examined individual ITPs. The ITP for individual participants was always under 1 when  
16 saccades were performed after a single reference stimulus (Supplementary Figure 1), i.e.  
17 perceived time of the test stimulus was compressed after a saccade. However, when the  
18 reference stimulus was repeated once (two presentations), all participants exhibited ITPs higher  
19 than 1. When two repetitions were presented, nine of 10 participants showed an ITP greater  
20 than 1. This trend suggests that repetition of a pre-saccadic reference stimulus eliminates  
21 perisaccadic time compression.

22 To further explore the results, we computed the psychometric functions based on the  
23 percentage of test stimuli perceived to be longer than reference stimuli (Figure 4). The point of  
24 subjective equivalence (PSE) for the test stimulus shows subjective time dilation in trials with  
25 repetition of reference stimulus before test (Figure 4-a). This result was observed for all tasks  
26 (i.e. *Saccade*, *Fixation*, and *Retina-Fixed Tasks*). To simplify our dataset for visualization,  
27 interpretation, and simulations (see modeling section below), we further divided this dataset  
28 into pools where the test stimuli were either shorter (140, 170 ms) or longer (230, 260 ms) than  
29 reference stimuli. On average, shorter trials were judged correctly (shorter) in all the tasks /  
30 repetitions, whereas longer trials were perceived incorrectly (shorter) when a single reference  
31 stimulus was followed by a saccade (Figure 4-b). This underestimation shows a loss of  
32 sensitivity (less difference between the two long and two short tests) in the saccade case  
33 compared to no saccade. Again, the perisaccadic time compression was negated (and even  
34 reversed to time dilation) when the reference stimulus was presented repeatedly (two or three  
35 times) before the test.

## 36 **2-2 Modeling results**

1 In the second part of this study, we used the empirical data described above to test between  
2 the models shown in Figure 1. The mathematical implementation of these models is described  
3 in the Supplementary Figure 4. To test the ability of each model to explain our observed S-R  
4 interactions, the S and R conditions were used as inputs of models and outputs were responses  
5 in SR condition. Two criteria were selected to testify the models. 1) Sensitivity (outputs of the  
6 model should correlate with the actual behavioral data). 2) Specificity (i.e., for specific model  
7 predictions these correlations should disappear when the data are randomly shuffled, whereas  
8 correlations due to overfitting the data should persist). These were determined through linear  
9 correlation analysis between output of models and original/shuffled data (see methods).

10 Figure 5 shows original data (upper row) and shuffled data (lower row) as a function of  
11 simulated model outputs. As noted above, the *linear scalar model* represents temporal  
12 variables as scalar numbers that should interact additively. The outputs of this model showed  
13 relatively low and nonsignificant (after Bonferroni correction) correlations with both the  
14 original ( $R=0.37$ ,  $p=0.32$ ) and random shuffled data ( $R=0.38$ ,  $p=0.36$ ). In contrast, the *neural*  
15 *network model* can be trained to fit various non-linear input-output relationships. The outputs  
16 of this model showed relatively high and significant (after Bonferroni correction) correlations  
17 for both the original data ( $R=0.81$ ,  $p=0.0001$ ), and the randomly shuffled data ( $R=0.65$ ,  
18  $p=0.0048$ ). Finally, the *vector model* works by representing time units as vectors and predicting  
19 the angles between these vectors. The outputs of the linear vector model exhibited high and  
20 significant correlation with the original data ( $R=0.79$ ,  $p<0.0001$ ), but not for the shuffled data ( $R$   
21  $= 0.38$ ,  $p = 0.061$ ). These findings suggest that the linear vector model could not explain our  
22 dataset, the neural network model performed better but was not specific to the actual dataset,  
23 whereas the linear vector model fit both of our criteria: it performed well, and was specific to  
24 the original unshuffled datasets.

### 25 **3- Discussion**

26 In this study, we asked how two separate time distortion effects (repetition time dilation and  
27 perisaccadic time compression) interact, and which time perception model can best explain the  
28 derived results. Overall, the behavioral results confirm previous findings on perisaccadic time  
29 compression<sup>14,33</sup> and relative effect of time dilation after a series of repetitive stimuli<sup>19,20,23</sup> but  
30 expand on this by showing how they interact. Results showed the relative time dilation induced  
31 by repetition of a reference stimulus before test stimulus neutralized the presence of an  
32 intervening saccade (i.e. the interactive effect of perisaccadic time compression and repetition  
33 time dilation is similar to single effect of repetition time dilation alone). To model this  
34 interaction, the resulting data were used as inputs/outputs for models of time perception  
35 (scalar clock, non-linear neural network, linear vector). The linear vector model performed best,

1 both in terms of specificity and ability to fit the data. Here, we will consider the experimental  
2 results in more detail, and discuss their implications for broader time perception theories.

3 In agreement with previous investigations<sup>12,14,15,33</sup>, our results showed that saccades compress  
4 the subjective perception of the duration of a briefly presented visual stimulus. Whereas  
5 previous investigations used empty temporal intervals (i.e. the interval between presentation  
6 of two stimuli<sup>14</sup> has been judged instead of duration of one presented stimulus), we presented  
7 the test stimulus during perisaccadic interval and participants judged the duration of the stimuli  
8 themselves. This demonstrates that, notwithstanding the presence of different mechanisms for  
9 time perception of brief empty or filled intervals<sup>34</sup>, saccadic time compression occurs in both  
10 cases. On the other hand, our results support previous studies<sup>13,19,20,23</sup> that found the relative  
11 duration of a novel stimulus after a series of repeated stimuli is perceived to be longer than the  
12 last repeated stimulus (in the repetitive series) with the same objective duration.

13 In *the Retina-Fixed Task*, the test stimulus was presented in a different spatial location (but  
14 same retinal location) relative to the repeated reference stimulus. Thus, in this task, the test  
15 stimulus shows two types of novelty compared to the reference stimuli: different location and  
16 different orientation. However, in this condition time dilation was not significantly different  
17 from that in our *Fixation Task* (where the test stimulus was presented in the same objective and  
18 retinal location as the reference stimulus). This suggests that objective spatial location did not  
19 have a strong effect on perceived time. This might be because the new location of our test  
20 stimulus was always predictable, and one could predict that the test stimulus would be  
21 presented in another possible location that was different from the location of reference  
22 stimulus. Whereas the randomized number of repetitions was not predictable in all tasks.

23 Various, often disconnected explanations have been provided for these phenomena. Saccadic  
24 remapping<sup>14,35</sup>, transient responses in visual cortex<sup>22</sup>, saccadic suppression<sup>16,26,35,36</sup> and  
25 attention<sup>16</sup> have been assumed to be associated with perisaccadic time compression, whereas  
26 time dilation of a novel stimulus (after a series of repeated stimuli) has been explained by  
27 attention<sup>23</sup> and repetition suppression mechanisms<sup>13,26</sup>. The latter two explanations (neural  
28 suppression and attention) are common to both phenomena (saccadic time compression and  
29 time dilation after a series of repeated stimuli) but the other proposed mechanisms for saccadic  
30 suppression can not explain time dilation for the novel stimulus following a repeated stimulus.  
31 Therefore, when considering how these phenomena might interact, we will focus on attention  
32 and neural suppression.

33 We will first consider the joint effects of attention on time distortions induced by saccade and  
34 repetition<sup>16,23</sup>, because this can be directly related to the internal time clock model simulated  
35 above. In the internal clock model, attention is considered as a switch between pacemaker and  
36 accumulator<sup>3,5,37</sup>. Higher level of attention allocation can turn on the switch and connect

1 pacemaker to accumulator (Figure 1-a). It causes to collect more timing pulses and may bring  
2 overestimation of time. Based on this assumption, the overestimation of time for a novel  
3 stimulus after a series of repeated stimuli can be explained by increased allocation of  
4 attentional resources to the novel stimulus (that is presented following the repeated stimuli) in  
5 comparison to repeated stimuli<sup>23,38</sup>. On the other hand, in saccade trials, attention is allocated  
6 to the saccade target, decreasing attentional allocation to the test stimulus, leading to  
7 perisaccadic time compression<sup>16</sup>. Based on this model, subjective time is a scalar parameter<sup>3</sup>  
8 that has accumulative property. This model thus predicts that a scalar combination of saccade  
9 and repetition trials should correlate with saccade-repetition trials (Fig. 1-a and Fig. 6).  
10 However, this did not occur in our results: instead, repetition obliterated the saccades effect.  
11 Thus, when these data were used to simulate the internal clock model, poor correlations  
12 resulted. By corollary, this also tends to refute current models based on scalar attention  
13 parameters.

14 The idea that suppression of brain activity can compress time perception was originally  
15 presented by Eagleman and Pariyadath as an *energy model* in time perception<sup>12,18-20,26</sup>. The  
16 basic idea is that just before and during saccade execution (the perisaccadic interval) certain  
17 brain areas show reduced activity<sup>35,39-41</sup>, and thus energy expenditure<sup>12,13,26</sup>. Since stimulus  
18 novelty (especially after a repeated stimulus) can increase neural activity / energy expenditure,  
19 it can (according to this theory) also dilate perceived time<sup>13,26</sup>. A limitation of this model is that  
20 the causal link from energy metabolism to information processing is indirect, at best. However,  
21 taking this theory at face value, when both effects (repetition and saccade) occur  
22 simultaneously, the level of energy spent in the brain will be decreased by one factor (the  
23 saccade) and increased by other (novelty after repetition). Again, this can be represented  
24 mathematically as a combination of two energies (scalar parameters) that are spent in different  
25 brain regions. Based on this assumption, behaviorally, we expect that one effect would cancel  
26 or weaken another effect (Supplementary figure 2). However, the correlation between outputs  
27 of the scalar model and empirical data was not significant. Thus, in this case scalar models of  
28 time perception (e.g. internal clock, and energy models) were not able to describe the joint  
29 time distortion effect of repetition and saccades.

30 Since the scalar timing models failed to justify the joint time distortion effects of saccade and  
31 repetition, SDNs model was employed as an alternative method. This model explains state-  
32 dependent computations in neural network level presents subjective time<sup>7,8,42-44</sup>. Previous  
33 SDNs modeling studies have showed that artificial neural networks can simulate the  
34 behavioural responses in different timing conditions such as rhythm perception<sup>8</sup> and can  
35 encode time-varying sensory and motor patterns<sup>45</sup>. This approach is similar to other artificial  
36 neural network studies that try to model a connectivity structure between incoming  
37 visual/auditory stimuli and behavioural responses. By this way, non-temporal perceptual

1 classification approaches (e.g. feedforward neural networks) that are usually working based on  
2 Hebbian law, can be used to classify and predict subjective time<sup>28</sup>. Consistent with the above  
3 studies, our, artificial neural network was able to fit the data in our study. However, such a  
4 network can fit almost anything, including a random shuffle of our data, i.e., it may have  
5 succeeded through overfitting. Thus, while this model was able to retroactively predict our  
6 data, the prediction was not specific.

7 A common element between scalar timing and SDN models is that they do not explicitly  
8 consider the concept of time in modern physics (time in Minkowski space). Objective time in  
9 these models is supposed to be the sequence of events, leading to subjective time perception.  
10 There is an interesting similarity between internal clock model and Newtonian absolute time,  
11 because both frameworks assumed an absolute generator that can create passage of time  
12 (Table 1). On the other hand, the SDN models assume moments can be coded via a  
13 nontemporal classification network and a Hebbian law is involved in learning and recognition of  
14 temporal patterns. However, based on modern physics theories each observer measures time  
15 as an intrinsic property from the environment, and this property can be changed based on  
16 information (entropy) and speed of both the environment and observer<sup>31,46</sup>. If we consider the  
17 brain as a physical observer, the same timing parameters should be hold in the brain and in the  
18 physical universe (Table 1). As time is characterized as a vector in Minkowski space, we used  
19 this concept in our last modeling approach. This vector model was originally suggested for time  
20 perception in long durations<sup>29</sup> but it can be proposed as a general time perception model for all  
21 intervals<sup>30</sup>.

22 Our modeling results show that the vector model<sup>29,30</sup> exhibited both sensitive and specific  
23 simulations of joint saccadic and repetition time distortion effects, i.e. in this model separate  
24 saccade and repetition result inputs predicted the combination of both effects. By representing  
25 perceptual effects as vectors and predicting the angles between these (Supplementary Figure  
26 4), this model was able to predict their interactions accurately and specifically. Conversely, in  
27 this model different time distortion effects can be considered as vectors in different directions  
28 that are added/subtracted to/from the original time vector (A detailed mathematical  
29 description of the specific vector interactions in our model can be found in *Supplementary*  
30 *Discussion*).

31 Overall, the results of vector timing model confirmed our hypothesis that subjective time has  
32 deep similarities to physical time and satisfied the first postulate of the special relativity  
33 theory<sup>46</sup>. In this model, more information than magnitude (that is considered in scalar models)  
34 is thought to be required to model dilation and compression of subjective time. Then,  
35 subjective time is characterized by vector units of time with two properties: magnitude and  
36 direction. When two time distortion effects are simultaneously interfered subjective time, two



1 vectors with different magnitudes and directions are added to subjective time. Presumably, this  
2 information theory model is instantiated at the level of neural networks and cellular signals, but  
3 at this time the biological mechanism is unknown.

4 In conclusion, we show here that global theories of time perception can be used to predict  
5 interactions between seemingly disparate experimental phenomena and conversely, those such  
6 interactions can help test between global theories. In particular, this study is the first to show  
7 the interaction between saccadic time suppression and repetition time dilation, and that this  
8 interaction follows the specific predictions of the vector model of time perception. In terms of  
9 broader implication, this is the first empirical-theoretical investigation that directly shows  
10 subjective time can be represented by the same time parameter as that used in physics.

11

## 12 **4- Method**

13 **4-1 Participants.** Ten volunteers (age: mean=31.5, range between 23 and 39, 5 female)  
14 participated in this study (included one of the authors; A. G.). All the participants had  
15 normal/corrected to normal vision and they did not report any visual or movement disorder. All  
16 the participants signed a written informed consent and study was approved by the office of  
17 research ethics (ORE) at York University. The sample size was selected based on previous  
18 studies. In three studies that considered saccadic time compression for brief durations (100 to  
19 200 ms), sample size was less than ten (in two of them sample size was just three  
20 subjects)<sup>14,15,22</sup> and we did not find any saccadic-timing study that has used more than seven  
21 participants for clarifying the timing distortion effect in this range of durations. Previous studies  
22 about expansion of time across repetitive stimulus to a novel one, has used around ten subjects  
23 <sup>19,20</sup>. Since the number of participants in previous studies is not enough to provide a power  
24 analysis. In this situation, the best thing that we could do was to select the maximum number  
25 of participants in previous studies (i. e. 10) and evaluate the individual results. Also, the effect  
26 size ( $\eta^2$ ) was calculated for each comparison. The results of this study showed acceptable effect  
27 sizes for saccade and repetition main effects as well as interaction between them (see result  
28 section).

29 **4-2 Setup.** Stimuli were back projected on a black display screen (1.9 × 1.4 m) with luminance  
30 level of 0.015 cd/m<sup>2</sup> and temporal resolution of presentation was 60 Hz. Participants sat in a  
31 dark room while their distance from the screen was 40 cm. After setting of this distance,  
32 participants asked to push their teeth on dental impression bar. Eye movement tracking was  
33 performed (in the *Saccade* and *Fixation Tasks*) using an Eyelink-2 system via a camera that was  
34 focused on right pupil. The task was programmed by C++ and build by Borland C++ version 5.02.

1 **4-3 Stimuli.** Three white parallel horizontal lines (thickness of line:  $1^\circ$ , distance between them:  
2  $4^\circ$ , total size  $11^\circ \times 11^\circ$ ) were presented as reference stimulus, while the test stimulus had same  
3 configuration with different orientation (vertical lines). Stimuli were presented at the right  
4 visual field ( $10^\circ$  from the center) and a fixation point was horizontally shown at center ( $x=0$ ). In  
5 the *Fixation Task*, fixation point was randomly presented at  $12.5^\circ$  above or below of center  
6 ( $x=0^\circ$ ,  $y=\pm 12.5^\circ$ ), while the location of stimuli was  $x=10^\circ$  and  $y=0^\circ$ . In the *Retina-Fixed Task*,  
7 fixation point was always presented at center ( $x=0^\circ$ ,  $y=0^\circ$ ) but stimuli (both of reference and  
8 test) was randomly shown  $12.5^\circ$  above or below of center line ( $x=10^\circ$ ,  $y=\pm 12.5^\circ$ ). In the *Saccade*  
9 *Task*, the location of stimuli was same as the *Fixation Task* ( $x=10^\circ$ ,  $y=0^\circ$ ) but the location of  
10 fixation point was randomly changed from  $x=0$  and  $y=\pm 12.5$  to a symmetric location below or  
11 above of center horizontal line of screen. All the stimuli were shown on a black background.

12 **4-4 Trials details and experiment design.** In each task, 240 trials were presented. There were  
13 three conditions for repetition (0, 1, 2 repetitions) and four conditions for duration of test  
14 stimulus (140 ms, 170 ms, 230 ms, 260 ms). Then, 20 trials ( $240/(3*4)$ ) are allocated to each  
15 condition. In all the conditions, a reference stimulus preceded a test stimulus. Duration of test  
16 stimulus was always 200 ms and interstimulus interval was 300 ms. In the *Saccade Task*, the  
17 fixation point was moved 100 ms before presentation of test stimulus (200 ms after reference  
18 stimulus presentation). After presentation of test stimulus participants were asked to judge  
19 which stimulus was longer, target or last reference stimulus? The procedure is presented in  
20 Figure 2. Trials are divided into two equal numbers for position of fixation point or stimuli (120  
21 trials for up of the center line and 120 trials for below).

22 **Saccade latencies.** Saccades were detected by Eyelink-2 system and recorded by a subroutine  
23 generated by visual C++ in two separate computers. The eye position signals were sent via serial  
24 port from eye tracking computer (first device) to eye movement recording computer (second  
25 device). The task was presented on a different computer (third device) and a trigger was sent  
26 via parallel port to eye movement recording computer (second device) when the location of  
27 fixation point was changed (saccade command). The time difference between saccade  
28 command and eye movement was considered as saccade latency. The acceptable saccade  
29 latency was between 150 ms and 400 ms. Trials that are not involved in this criterion were  
30 removed. Since the test stimulus was always presented during saccade preparation / execution  
31 (perisaccadic interval) and vanished before fixation of the eyes at their new position (Fig. 2-b),  
32 the related time distortion effect is thought to be perisaccadic time compression<sup>14</sup> rather than  
33 time expansion or chronostasis which may occur immediately following a saccade<sup>21</sup>.

34 **4-5 Data analysis.** The exclusion criteria for rejected trials were including: 1) Performing  
35 saccades during standard/test stimuli presentations during fixation intervals. 2) Late (later than  
36 400 ms after fixation-point movement) or early (earlier than 150 ms after fixation-point

1 movement) saccade execution in saccade trials. 3) Trials with no responses. 4) When eyes were  
2 fixated over a point out of fixation point location (e. g. stimulus) during stimuli presentation. 5)  
3 When participants were affected by any unintended external stimulus (e. g. extra noises,  
4 talking, movement and so on) during the trial presentation. Based on these criteria, the  
5 percentage of data exclusion was less than 30 % of all trials for each participant (mean=16.8%,  
6 SD=8.79%). Trial rejection was performed by self-developed subroutines in MATLAB R2018a.

7 A repeated measure analysis of variance (ANOVA) with post hoc Bonferroni test was performed  
8 to evaluate within subject significant differences in general effects (two factors of repetitions  
9 and tasks) and interactions between them. Before the parametric analysis, normality and equal  
10 variance assumptions were satisfied, and sphericity was assumed according to Mauchly's test.  
11 The statistical analysis was performed using IBM SPSS Statistics 19.

12 For the objective of data presentation and statistical analysis the individual timing performance  
13 (ITP) was defined. The ITP measured the longer trials that were correctly judged longer in  
14 saccade and repetition conditions. To calculate ITP the  $t_S$ ,  $t_R$ ,  $t_{SR}$  (the percentage of longer  
15 trials that were correctly judged longer in saccade, repetition and both saccade/repetition  
16 trials, respectively) were divided by the  $t_{pure}$  (the percentage of longer trials that were  
17 correctly judged longer in trials without saccade and repetition) as:

$$18 \quad ITP_{S,R,SR} = \frac{t_{S,R,SR}}{t_{pure}} \quad (\text{eq. 1}).$$

19 Based on this formulization, when  $ITP > 1$ , overestimation of time has been occurred while  $ITP < 1$   
20 shows underestimation of time. ITPs were calculated for each participant using MATLAB  
21 R2018a.

22 **4-6 Models.** We tested three different models (linear scalar model, linear vector model and  
23 state dependent network model) based on previous hypotheses about time perception (Figure  
24 1, 6). In all the models, two inputs  $ITP_R$ ,  $ITP_S$ , and one output  $ITP_{SR}$  were considered.

25 For all the models, totally 40 patterns were made by four conditions (1 repetition in control-  
26 1xsaccade, 2 repetitions in control-1xsaccade, 1 repetition in control-2xsaccade, 2 repetitions  
27 in control-2xsaccade) of ten participants. Regression analysis between output of models and  
28 real data was used to validate sensitivity of models (is model working for real data?). A set of  
29 random permuted data was also used to test the specificity of models (is model not working for  
30 random data?).

31 The linear scalar model was implemented based on a wide range of studies that considered the  
32 internal clock and scalar expectancy theory<sup>3,47</sup>. In this model, saccade and repetition have been  
33 considered as distortion effects that can accelerate or decelerate the accumulation rate of

1 pacemakers (clocks). This acceleration/deceleration were linearly applied on perceive time in  
2 absence of distortions ( $t_{pure}$ ) by applying positive weights to adjust the rate of pacemakers. All  
3 the possible weighs were applied to find the best performance of the model.  
4 Schematic/mathematic framework of this model has been presented in Supplementary Figure  
5 4.

6 The second model was implemented based on state depended network model<sup>6-8</sup>. To this end,  
7 an artificial neural network (ANN) with multi layer perceptron structure (two inputs perceptron,  
8 two hidden layers with 10 perceptrons in each layer and one output perceptron) was  
9 employed. A back-propagation algorithm was used for ANN training. We used 30 data as train  
10 data and 10 data as test data. To evaluate the effect of different datasets on efficacy of ANN  
11 and to avoid overfitting problem, we used 100 different patterns as training and testing  
12 datasets (Supplementary figure 3). Since other models contain 40 data in regression analysis,  
13 we consider the results of 4 training and testing (that has highest correlation coefficients (R  
14 values) among all datasets during test) in regression analysis. The mathematical processes of  
15 this modeling method are presented in Figure 6. We used artificial neural network toolbox in  
16 MATLAB 2019b to create the ANN model.

17 The third model was accomplished based on our previous hypothesis that state time in the  
18 brain has same properties with physical time and generate/observe via vector units<sup>29,30</sup>. In this  
19 model, time distortions are considered as different vector units to strengthen (dilation) or  
20 destroy (compression) the vector of perceived time in absence of distortion effects ( $t_{pure}$ ). This  
21 linear vector model was implemented by applying the  $\cos(\phi, \psi)$  (instead of the  
22 acceleration/deceleration weights of perceived time in scalar models). Where  $\phi$ , and  $\psi$  were  
23 the assumed angles between the vectors of time distortion effects (i.e. saccade and repetition,  
24 respectively) and the vector of time in absence of time distortion effects. This model fellows a  
25 linear formula where two distortion effects are linearly added to  $t_{pure}$ . All the possible angles  
26 were tested, and model efficiency was obtained for these various angles (Supplementary figure  
27 3). Supplementary Figure 4 exhibits this model mathematically and schematically. All the  
28 models have been generated by MATA LB 2019b.

## 29 **5- Acknowledgements:**

30 We thank Drs. P. Cavanagh, V. Bharmauria and P.A. Khoozani for editorial comments on the  
31 manuscript, and Dr X. Yan, S. Sun, and G. Tomou for technical support. This project was funded  
32 by a Natural Sciences and Engineering Research Council of Canada (NSERC) Discovery grant.  
33 A.H. Ghaderi was supported by the Vision: Science to Applications Program, funded in part by  
34 the Canada First Research Excellence Fund. J.D. Crawford was supported by a Canada Research  
35 Chair.

36

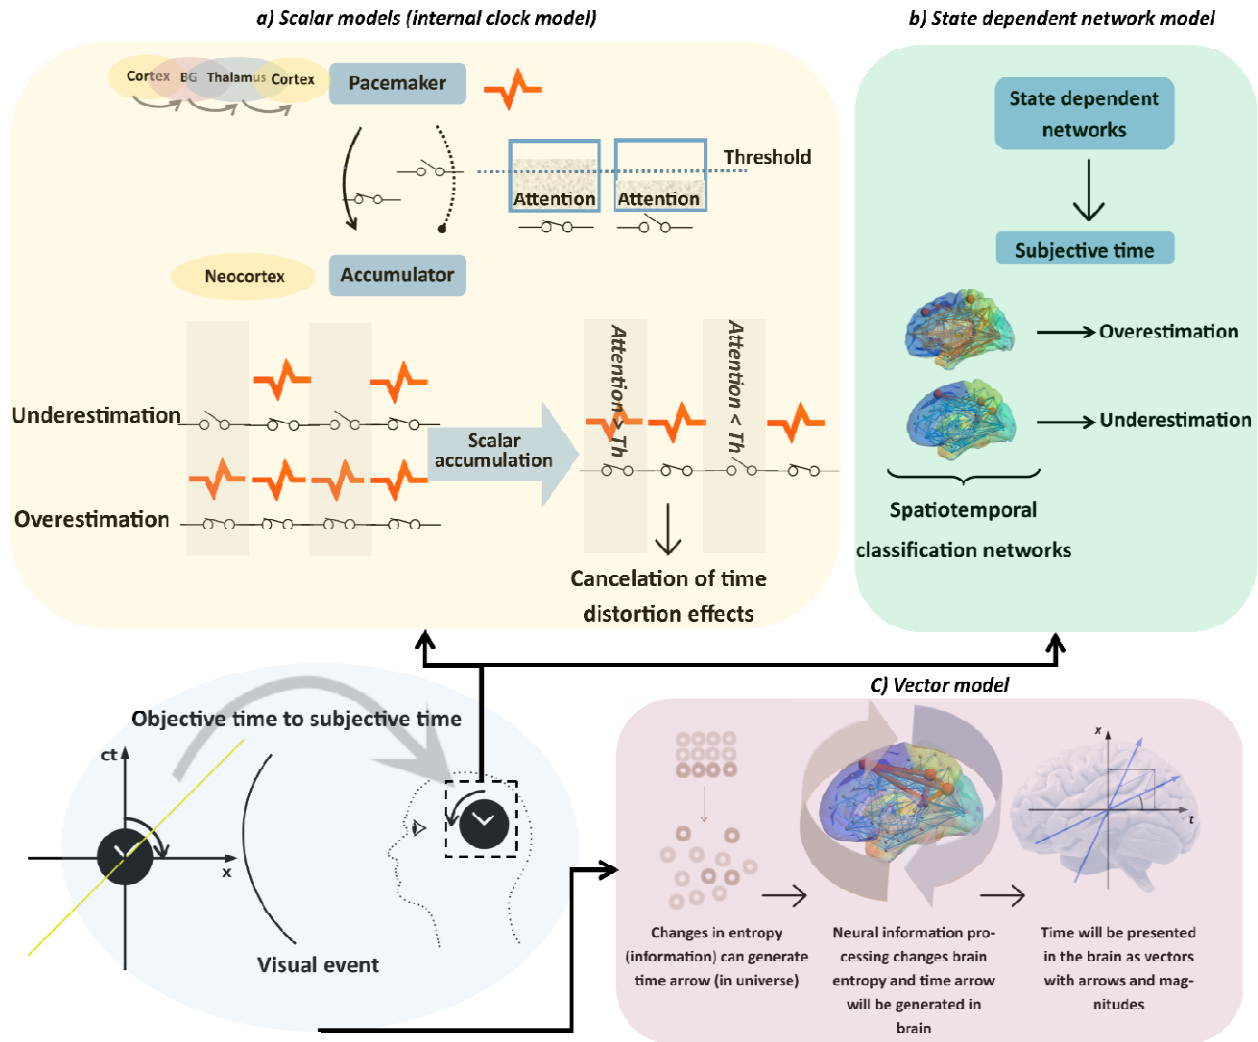

1  
2  
3  
4  
5  
6  
7

Figure 1:

- How brain can process time. The objective time that is embedded in a visual event and subjective time that is measured in the brain are characterized in two separate frameworks (universe and brain).

**a) Scalar models) Internal clock model:** In this model, an anatomical pacemaker-accumulator structure is suggested to generate and collect scalar timing pulses. A cortico-basal ganglion-thalamocortical pathway is suggested as pacemaker<sup>5,48,49</sup> and different cortical regions are suggested as accumulator<sup>5,24,48,50</sup>. In this model, attention is assumed to connect the pacemaker to accumulator as a switch<sup>3</sup>. Usually an attention threshold is considered, and the switch will be closed when the attention is higher than this level. Otherwise, the switch is open, and accumulator can not collect timing pulses. Then higher level of attention cause to overestimation of time and lower attentional allocation will lead to underestimation of time.

1 When separate time distortion effects alter the level of attention in different directions (one  
2 increases attention and other decreases that) the underestimation and overestimation effects  
3 cancel each other. **b) State dependent network model:** In this model different states of neural  
4 networks can demonstrate various time perception states. Then, the brain can recognize long  
5 and short durations via Hebbian learning law and by spatiotemporal classification network  
6 instead of specialized temporal structures.

7 **c) Vector model:** A vector model explains the subjective and objective times are processed in  
8 the brain and universe via same formulization. This model describes physical parameters (e.g.  
9 entropy and speed that are involved in measurement of objective time) are also corresponded  
10 in subjective time. For example, as the entropy of universe is increased and objective time is  
11 passed, information processing in the brain increases the level of entropy in the brain and  
12 subjective time will be passed. In this framework, brain and universe are considered as observer  
13 and environment, respectively. Objective time can be measured in the brain as subjective time.  
14 Both timing contexts can be formulated in Minkowski space as vectors (with arrows and  
15 magnitudes).

1

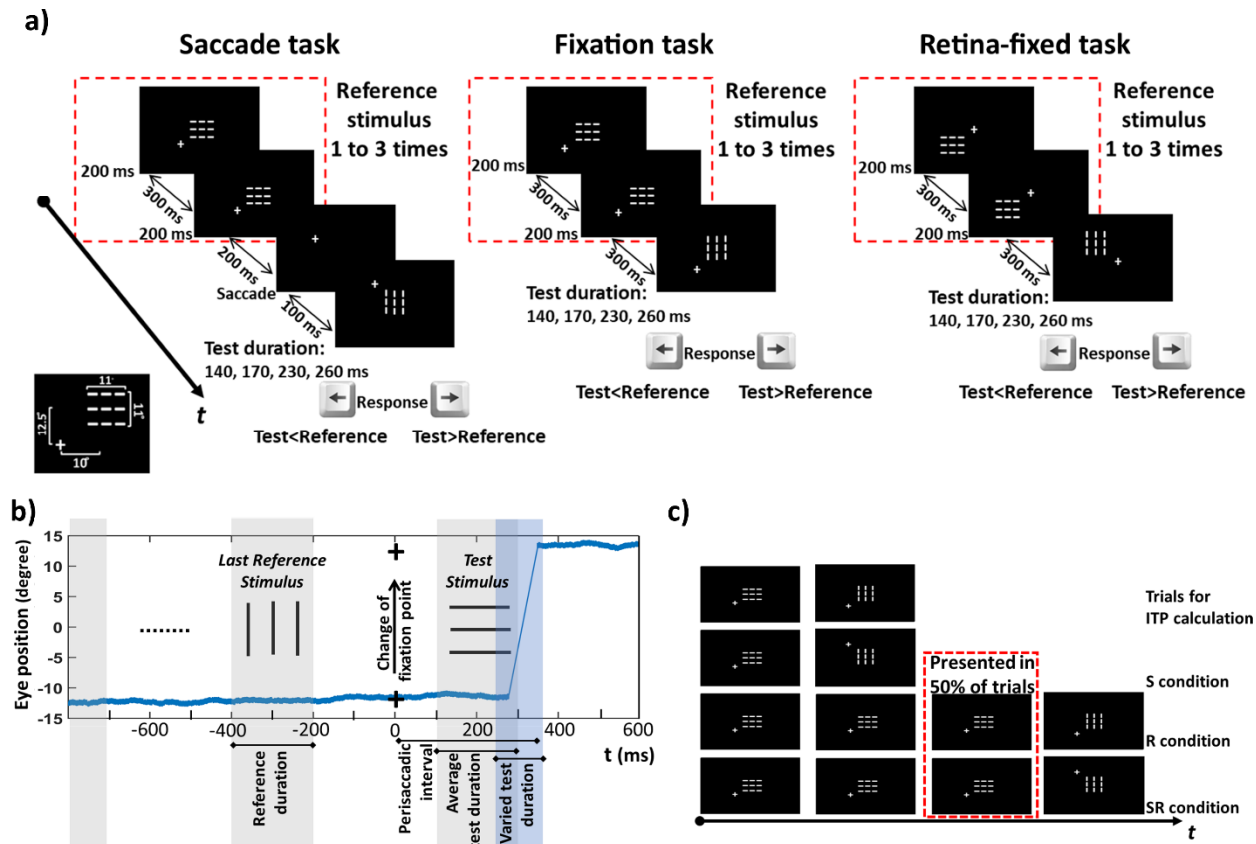

2

3 Figure 2: a) Experimental design. We asked participants to judge the duration of a novel test  
 4 stimulus (a horizontal or vertical grid) in comparison with the most recently presented  
 5 reference stimulus (a grid with the opposite orientation). Participants fixed at one of the four  
 6 corners relative to these stimuli. Three stimulus tasks (saccade, and two fixation controls) were  
 7 presented in separate blocks, counterbalanced across. In each block, a series of 1-3  
 8 (randomized) 200ms reference stimuli were presented at centre, followed by the test stimulus  
 9 (140, 170, 230 or 260ms, randomized) at the same or 90 deg rotated orientation. After each  
 10 trial, participants responded the test stimulus duration was shorter or longer than the  
 11 reference stimulus. Participants always began fixating 8.3 degrees diagonally from one of the  
 12 four corners of the reference stimulus location. In the *Saccade Task*, the fixation point shifted  
 13 up or down to the opposite corner on the same horizontal side, 100 ms before test  
 14 presentation, eliciting a 25 degree vertical saccade during display of the test stimulus (and  
 15 causing the retinal location of the stimuli to shift). The *Fixation Task* was performed with fixed  
 16 gaze and stimuli locations whereas gaze was fixed in the *Retina-Fixed Task*, but the location of  
 17 the test stimulus was shifted to match the retinal locations of the *Saccade Task*. b) Temporal  
 18 evaluation and eye position in the *Saccade Task*. After presentation of the last reference  
 19 stimulus (200 ms), the location of fixation point was changed. Then, the test stimulus was

1 presented (after 100 ms) and eye position was changed (after saccade latency). Presentation of  
2 the test stimulus (with variable durations) was occurred during perisaccadic interval. c)  
3 Different trials have been affected by different types of time distortion effects: i.e. saccade (S),  
4 repetition (R) and both saccade and repetition (SR). Trials that were not affected by time  
5 distortion effects have been used to calculate ITPs. Statistical analysis and modeling processes  
6 have been performed using this arrangement of trials.



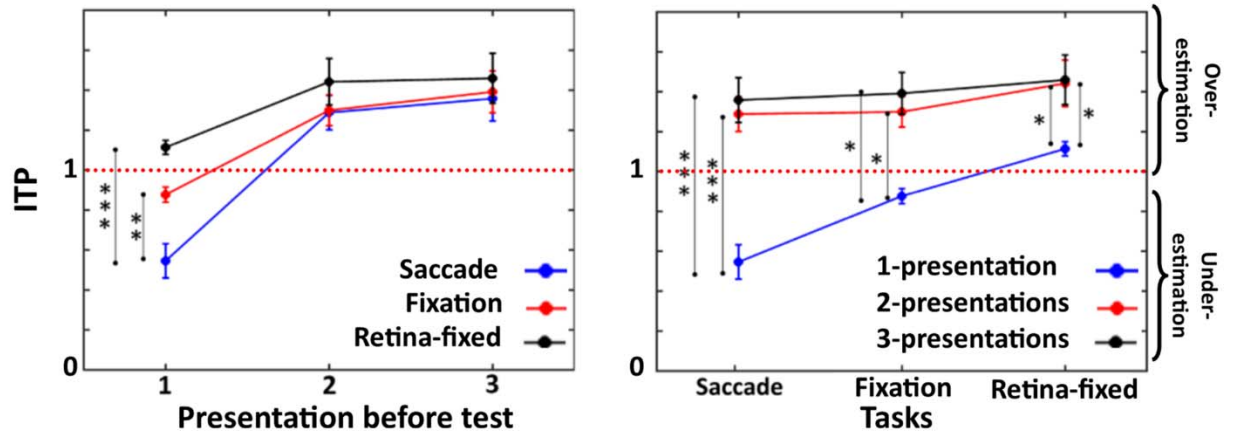

1

2 Figure 3: Statistical results to show significant results between different tasks and presentations  
3 of test stimulus. One-star (\*) indicates ( $p < 0.05$ ), two-stars (\*\*) indicates ( $p < 0.01$ ), and three-  
4 stars (\*\*\*) shows ( $p < 0.001$ ). Error bars are standard error of means.

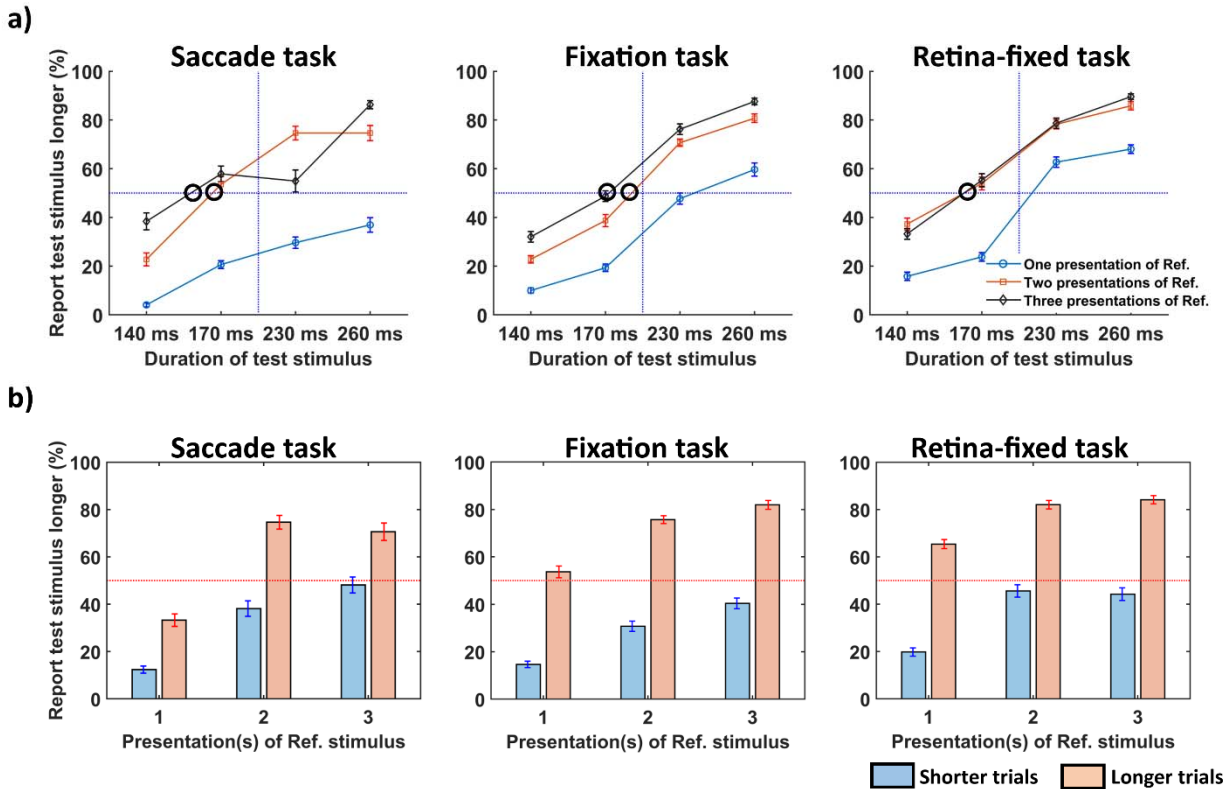

1  
2 Figure 4: a) Point of subjective equality (PSE) for test stimulus in different conditions (tasks and  
3 presentations of reference stimulus). Middle vertical blue line shows the duration of reference  
4 stimulus (200 ms). In all tasks (*Saccade*, *Fixation*, and *Retina-fixed*) charts that are related to  
5 two (red) and three (black) reference presentations crossed the 50% line (blue horizontal line)  
6 at the left side of middle vertical line (black circles) and this means overestimation of time. The  
7 blue chart in the saccade task (that is related to one presentation of reference) has not crossed  
8 the 50% line and duration of test stimuli (either longer or shorter) has been perceived shorter  
9 than duration of reference in more than 50% of trials. b) Psychometric functions showed the  
10 percentage of longer responses for *shorter* and *longer* trials. The charts have been shown for  
11 different tasks and different numbers of test stimulus presentation. Longer trial (pink bar) that  
12 is located below the center red line shows underestimation of time (one presentation in the  
13 *Saccade Task*). Otherwise, in the other tasks (*Fixation* and *Retina-fixed tasks*), longer trials have  
14 been correctly judged longer. Error bars are standard error of means.

15

16

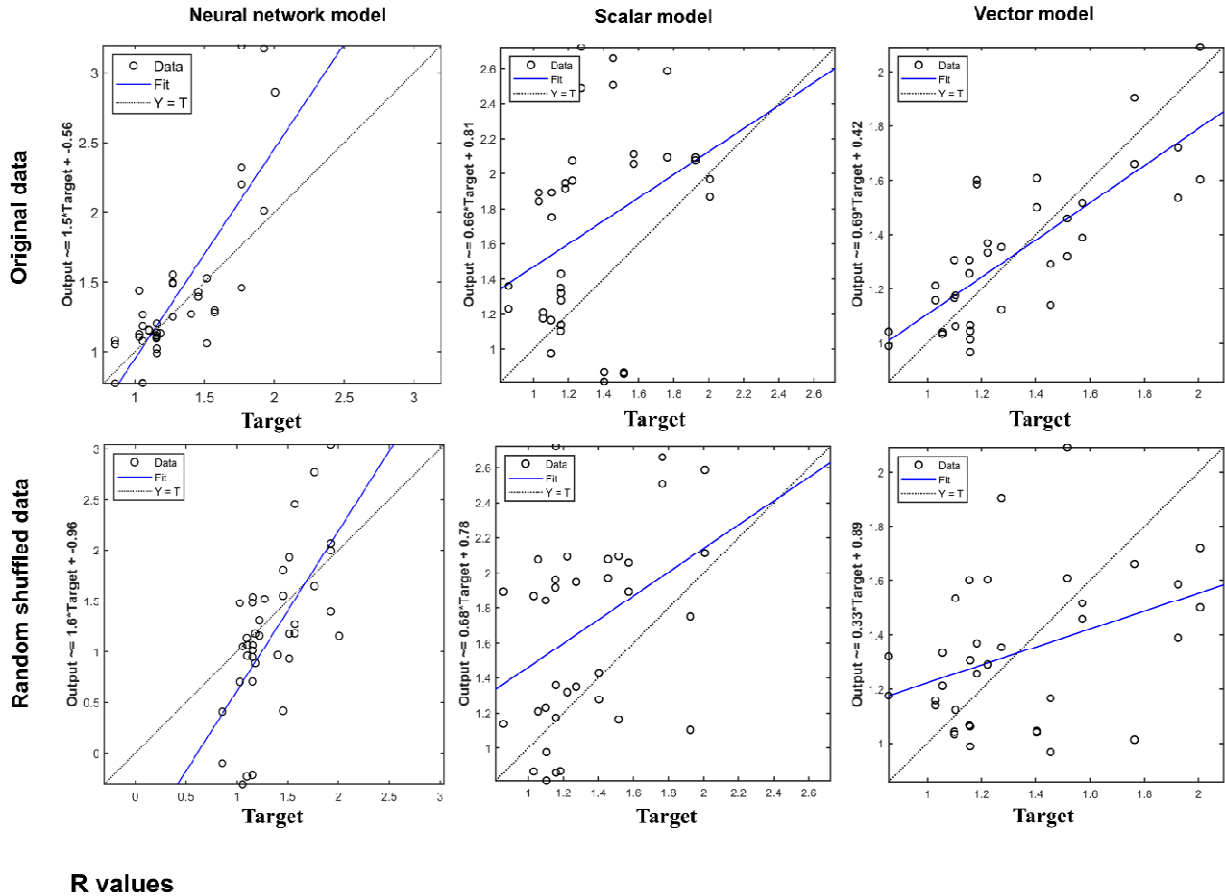

|                      | Scalar model             | Neural network model               | Vector model                       |
|----------------------|--------------------------|------------------------------------|------------------------------------|
| Original data        | R = 0.37, p-value = 0.32 | <b>R = 0.81, p-value &lt; 0.01</b> | <b>R = 0.79, p-value &lt; 0.01</b> |
| Random shuffled data | R = 0.38, p-value = 0.36 | <b>R = 0.65, p-value &lt; 0.01</b> | R = 0.38, p-value = 0.06           |

1  
 2 Figure 5: **Above:** Regression scatter plots, correlation coefficients (R) and p-values of correlation  
 3 analysis between responses in behavioural tasks and output of models. Datapoints present ITPs  
 4 for different participants in different conditions. The output of both neural network and vector  
 5 models exhibited significant correlations with experimental datapoints. But the correlation  
 6 between output of scalar model and experimental datapoints was not significant. **Bottom:**  
 7 Models were tested by random shuffled dataset generated from original data (outputs were  
 8 assigned to irrelevant inputs). Several random datasets were tested, and the best accuracy of  
 9 models was presented. The output of neural network model is still showed a significant  
 10 correlation with random shuffled experimental datapoints. However, outputs of vector and  
 11 scalar models were not significantly correlated with random shuffled experimental results.

12

1

2 Table 1: Objective and subjective time and relation between them in different time perception  
3 models.

| Model                                | Objective time                   | Subjective time                        | Timing rule                                                                                                                                                |
|--------------------------------------|----------------------------------|----------------------------------------|------------------------------------------------------------------------------------------------------------------------------------------------------------|
| <b>Internal clock model</b>          | Successive events                | Number of neural pulses                | Counting of pulses in specific brain regions can generate time. Same mechanism is suggested in Newtonian framework for physical time.                      |
| <b>Energy model</b>                  | -                                | Energy spent in the brain              | The value of energy in the brain (a scalar parameter) can generate time. There is no identity in the physics.                                              |
| <b>State dependent network model</b> | Successive events                | Spatiotemporal classification networks | Different states of brain networks can present time. Hebbian law supports this idea.                                                                       |
| <b>Vector model</b>                  | Physical time in Minkowski space | Physical time in Minkowski space       | Physical properties of brain (i.e. entropy and speed) can measure subjective time.<br><br>Same mechanism is suggested in modern physics for physical time. |

4

5

6

7

8

9

## References

- 10 1. Grondin, S. From physical time to the first and second moments of psychological time.  
11 *Psychol. Bull.* (2001). doi:10.1037/0033-2909.127.1.22
- 12 2. Meck, W. H. Neuropsychology of timing and time perception. *Brain Cogn.* (2005).  
13 doi:10.1016/j.bandc.2004.09.004
- 14 3. GIBBON, J., CHURCH, R. M. & MECK, W. H. Scalar Timing in Memory. *Ann. N. Y. Acad. Sci.*  
15 (1984). doi:10.1111/j.1749-6632.1984.tb23417.x
- 16 4. Ivry, R. B. & Schlerf, J. E. Dedicated and intrinsic models of time perception. *Trends in*  
17 *Cognitive Sciences* (2008). doi:10.1016/j.tics.2008.04.002
- 18 5. Meck, W. H. & Benson, A. M. Dissecting the brain's internal clock: How frontal-striatal  
19 circuitry keeps time and shifts attention. *Brain Cogn.* (2002). doi:10.1006/brcg.2001.1313

- 1 6. Buonomano, D. V. & Maass, W. State-dependent computations: Spatiotemporal  
2 processing in cortical networks. *Nature Reviews Neuroscience* (2009).  
3 doi:10.1038/nrn2558
- 4 7. Karmarkar, U. R. & Buonomano, D. V. Timing in the Absence of Clocks: Encoding Time in  
5 Neural Network States. *Neuron* (2007). doi:10.1016/j.neuron.2007.01.006
- 6 8. Hardy, N. F., Goudar, V., Romero-Sosa, J. L. & Buonomano, D. V. A model of temporal  
7 scaling correctly predicts that motor timing improves with speed. *Nat. Commun.* **9**, 1–14  
8 (2018).
- 9 9. Droit-Volet, S. & Meck, W. H. How emotions colour our perception of time. *Trends Cogn.*  
10 *Sci.* (2007). doi:10.1016/j.tics.2007.09.008
- 11 10. Wittmann, M. The inner sense of time: How the brain creates a representation of  
12 duration. *Nature Reviews Neuroscience* (2013). doi:10.1038/nrn3452
- 13 11. Craig, A. D. Emotional moments across time: A possible neural basis for time perception  
14 in the anterior insula. *Philosophical Transactions of the Royal Society B: Biological*  
15 *Sciences* (2009). doi:10.1098/rstb.2009.0008
- 16 12. Eagleman, D. M. Distortions of time during rapid eye movements. *Nat. Neurosci.* **8**, 850–  
17 851 (2005).
- 18 13. Eagleman, D. M. Human time perception and its illusions. *Current Opinion in*  
19 *Neurobiology* (2008). doi:10.1016/j.conb.2008.06.002
- 20 14. Morrone, M. C., Ross, J. & Burr, D. Saccadic eye movements cause compression of time  
21 as well as space. *Nat. Neurosci.* **8**, 950–954 (2005).
- 22 15. Binda, P., Cicchini, G. M., Burr, D. C. & Morrone, M. C. Spatiotemporal Distortions of  
23 Visual Perception at the Time of Saccades. *J. Neurosci.* **29**, 13147–13157 (2009).
- 24 16. Penney, T. B. *et al.* Saccades and subjective time in seconds range duration reproduction.  
25 *Timing Time Percept.* **4**, 187–206 (2016).
- 26 17. Zimmermann, E., Born, S., Fink, G. R. & Cavanagh, P. Masking produces compression of  
27 space and time in the absence of eye movements. *J. Neurophysiol.* (2014).  
28 doi:10.1152/jn.00156.2014
- 29 18. Sadeghi, N. G., Pariyadath, V., Apte, S., Eagleman, D. M. & Cook, E. P. Neural correlates of  
30 subsecond time distortion in the middle temporal area of visual cortex. *J. Cogn. Neurosci.*  
31 (2011). doi:10.1162/jocn\_a\_00071
- 32 19. Pariyadath, V. & Eagleman, D. The effect of predictability on subjective duration. *PLoS*  
33 *One* (2007). doi:10.1371/journal.pone.0001264
- 34 20. Pariyadath, V. & Eagleman, D. M. Subjective Duration Distortions Mirror Neural

- 1            Repetition Suppression. *PLoS One* (2012). doi:10.1371/journal.pone.0049362
- 2    21.    Yarrow, K., Haggard, P., Heal, R., Brown, P. & Rothwell, J. C. Illusory perceptions of space  
3            and time preserve cross-saccadic perceptual continuity. *Nature* **414**, 302–305 (2001).
- 4    22.    Terao, M., Watanabe, J., Yagi, A. & Nishida, S. Reduction of stimulus visibility compresses  
5            apparent time intervals. *Nat. Neurosci.* **11**, 541–542 (2008).
- 6    23.    Matthews, W. J. & Gheorghiu, A. I. Repetition, expectation, and the perception of time.  
7            *Current Opinion in Behavioral Sciences* (2016). doi:10.1016/j.cobeha.2016.02.019
- 8    24.    Buhusi, C. V. & Meck, W. H. Relativity theory and time perception: Single or multiple  
9            clocks? *PLoS One* (2009). doi:10.1371/journal.pone.0006268
- 10   25.    Johnston, A., Arnold, D. H. & Nishida, S. Spatially localized distortions of event time. *Curr.*  
11            *Biol.* (2006). doi:10.1016/j.cub.2006.01.032
- 12   26.    Eagleman, D. M. & Pariyadath, V. Is subjective duration a signature of coding efficiency?  
13            *Philosophical Transactions of the Royal Society B: Biological Sciences* (2009).  
14            doi:10.1098/rstb.2009.0026
- 15   27.    Mauk, M. D. & Buonomano, D. V. THE NEURAL BASIS OF TEMPORAL PROCESSING. *Annu.*  
16            *Rev. Neurosci.* (2004). doi:10.1146/annurev.neuro.27.070203.144247
- 17   28.    Roseboom, W. *et al.* Activity in perceptual classification networks as a basis for human  
18            subjective time perception. *Nat. Commun.* (2019). doi:10.1038/s41467-018-08194-7
- 19   29.    Ghaderi, A. H. *et al.* Time estimation and beta segregation: An EEG study and graph  
20            theoretical approach. *PLoS One* **13**, (2018).
- 21   30.    Ghaderi, A. H. Heat transfer, entropy and time perception: Toward finding a possible  
22            relation between subjective and objective time. *Med. Hypotheses* **122**, 172–175 (2019).
- 23   31.    Lebowitz, J. L. Boltzmann’s Entropy and Time’s Arrow. *Phys. Today* (1993).  
24            doi:10.1063/1.881363
- 25   32.    Dace, T. The arrow of time. *Cosm. Hist.* (2018). doi:10.1080/07494468400640121
- 26   33.    Burr, D. C., Ross, J., Binda, P. & Morrone, M. C. Saccades Compress Space, Time, and  
27            Number. *Space, Time Number Brain* **14**, 175–186 (2011).
- 28   34.    Grondin, S. Duration discrimination of empty and filled intervals marked by auditory and  
29            visual signals. *Percept. Psychophys.* (1993). doi:10.3758/BF03205274
- 30   35.    Prime, S. L., Vesia, M. & Crawford, J. D. Transcranial Magnetic Stimulation over Posterior  
31            Parietal Cortex Disrupts Transsaccadic Memory of Multiple Objects. *J. Neurosci.* (2008).  
32            doi:10.1523/JNEUROSCI.0542-08.2008
- 33   36.    Dunkley, B. T., Baltaretu, B. & Crawford, J. D. Trans-saccadic interactions in human

- 1 parietal and occipital cortex during the retention and comparison of object orientation.  
2 *Cortex* (2016). doi:10.1016/j.cortex.2016.06.012
- 3 37. Iwasaki, M., Noguchi, Y. & Kakigi, R. Neural correlates of time distortion in a preaction  
4 period. *Hum. Brain Mapp.* 1–14 (2018). doi:10.1002/hbm.24413
- 5 38. Tse, P. U., Intriligator, J., Rivest, J. & Cavanagh, P. Attention and the subjective expansion  
6 of time. *Percept. Psychophys.* (2004). doi:10.3758/BF03196844
- 7 39. Thiele, A., Henning, P., Kubischik, M. & Hoffmann, K. P. Neural mechanisms of saccadic  
8 suppression. *Science (80-. )*. (2002). doi:10.1126/science.1068788
- 9 40. Bremmer, F., Kubischik, M., Hoffmann, K. P. & Krekelberg, B. Neural dynamics of saccadic  
10 suppression. *J. Neurosci.* (2009). doi:10.1523/JNEUROSCI.2908-09.2009
- 11 41. Niemeier, M., Crawford, J. D. & Tweed, D. B. Optimal transsaccadic integration explains  
12 distorted spatial perception. *Nature* (2003). doi:10.1038/nature01439
- 13 42. Buonomano, D. V. & Maass, W. State-dependent computations: Spatiotemporal  
14 processing in cortical networks. *Nature Reviews Neuroscience* (2009).  
15 doi:10.1038/nrn2558
- 16 43. Buonomano, D. V. & Merzenich, M. M. Temporal information transformed into a spatial  
17 code by a neural network with realistic properties. *Science (80-. )*. (1995).  
18 doi:10.1126/science.7863330
- 19 44. Johnson, H. A., Goel, A. & Buonomano, D. V. Neural dynamics of in vitro cortical networks  
20 reflects experienced temporal patterns. *Nat. Neurosci.* (2010). doi:10.1038/nn.2579
- 21 45. Goudar, V. & Buonomano, D. V. Encoding sensory and motor patterns as time-invariant  
22 trajectories in recurrent neural networks. *Elife* (2018). doi:10.7554/eLife.31134
- 23 46. Einstein, A. & Lawson, R. W. *Relativity: The special and the general theory. Relativity: The  
24 Special and the General Theory* (2012). doi:10.4324/9780203518922
- 25 47. Wearden, J. H. & Lejeune, H. Scalar properties in human timing: Conformity and  
26 violations. *Q. J. Exp. Psychol.* (2008). doi:10.1080/17470210701282576
- 27 48. Pouthas, V. *et al.* Neural network involved in time perception: An fMRI study comparing  
28 long and short interval estimation. *Hum. Brain Mapp.* (2005). doi:10.1002/hbm.20126
- 29 49. Matell, M. S. & Meck, W. H. Cortico-striatal circuits and interval timing: Coincidence  
30 detection of oscillatory processes. *Cognitive Brain Research* (2004).  
31 doi:10.1016/j.cogbrainres.2004.06.012
- 32 50. Buetti, D. & Macaluso, E. Physiological correlates of subjective time: Evidence for the  
33 temporal accumulator hypothesis. *Neuroimage* (2011).  
34 doi:10.1016/j.neuroimage.2011.05.014
